# Supplementary material for: Spirulina Supplements as a Source of Mineral Nutrients in the Daily Diet
Source: MDPI journal article supplement (doi:10.3390/app13021011), 2023-01-11
Supplement: s1 [file s1]

**Table S1.** Element content of tested samples (n=33) of spirulina supplements - results of statistical analysis

| Elements | Mean     | Median   | Min.     | Max.     | Lower quartile | Upper quartile | Standard deviation |
|----------|----------|----------|----------|----------|----------------|----------------|--------------------|
| Ca       | 8554.46  | 2098.99  | 761.191  | 76781.53 | 1457.54        | 5817.82        | 17869.90           |
| Fe       | 664.80   | 531.85   | 212.228  | 2785.82  | 453.93         | 716.84         | 436.81             |
| Mg       | 3726.32  | 3452.96  | 2134.017 | 11067.04 | 2952.04        | 4001.51        | 1283.81            |
| K        | 14274.26 | 14234.06 | 9019.566 | 38335.28 | 11971.98       | 16074.77       | 3628.57            |
| Na       | 13439.40 | 12663.36 | 3102.046 | 36144.06 | 8920.65        | 18298.93       | 6793.01            |
| Sr       | 42.83    | 28.99    | 6.784    | 258.42   | 19.50          | 43.60          | 45.59              |
| Zn       | 45.96    | 28.33    | 7.068    | 322.14   | 14.95          | 39.83          | 71.57              |
| P        | 15149.59 | 11918.54 | 7196.181 | 70759.49 | 10890.38       | 12834.56       | 13024.69           |
| Se       | 0.31     | 0.12     | 0.031    | 5.69     | 0.08           | 0.19           | 0.91               |

**Table S2.** Element content in spirulina supplements depending on the form of the supplement

| Elements | Powder (n=7)             |          |          |          | Tablets (n=26) |          |          |          | p value   |
|----------|--------------------------|----------|----------|----------|----------------|----------|----------|----------|-----------|
|          | Mean                     | Median   | Min.     | Max.     | Mean           | Median   | Min.     | Max.     |           |
|          | Elements content [mg/kg] |          |          |          |                |          |          |          |           |
| Ca       | 4278.25                  | 2259.87  | 761.19   | 9939.64  | 9705.75        | 2070.27  | 870.892  | 76781.53 | 0.267682  |
| P        | 11225.16                 | 11169.18 | 7196.18  | 15075.24 | 16206.17       | 11924.94 | 8398.983 | 70759.49 | 0.120306  |
| Mg       | 4151.03                  | 3936.22  | 2610.30  | 11067.04 | 3611.98        | 3292.01  | 2134.017 | 7307.01  | 0.010622* |
| K        | 16686.65                 | 15451.00 | 13308.13 | 38335.28 | 13624.77       | 13504.60 | 9019.566 | 21282.61 | 0.001389* |
| Na       | 9868.43                  | 8938.04  | 3524.14  | 20874.32 | 14400.81       | 14488.87 | 3102.046 | 36144.06 | 0.008072* |
| Fe       | 673.10                   | 619.95   | 461.07   | 1162.29  | 662.57         | 502.91   | 212.228  | 2785.82  | 0.042945* |
| Zn       | 22.73                    | 19.15    | 8.95     | 44.88    | 52.21          | 29.11    | 7.068    | 322.14   | 0.081545  |
| Se       | 0.13                     | 0.12     | 0.06     | 0.22     | 0.36           | 0.12     | 0.031    | 5.69     | 0.700103  |
| Sr       | 48.73                    | 35.63    | 18.19    | 128.25   | 41.24          | 24.84    | 6.784    | 258.42   | 0.099426  |

\*p < 0.05 - statistically significant difference

**Table S3.** Element content of spirulina supplements depending on cultivation method

| Elements | Conventional growing (n=23) |          |          |          | Organic growing (n=10) |          |          |          | p value   |
|----------|-----------------------------|----------|----------|----------|------------------------|----------|----------|----------|-----------|
|          | Mean                        | Median   | Min.     | Max.     | Mean                   | Median   | Min.     | Max.     |           |
|          | Elements content [mg/kg]    |          |          |          |                        |          |          |          |           |
| Ca       | 11269.39                    | 2177.70  | 761.191  | 76781.53 | 2310.14                | 1806.04  | 870.89   | 7299.05  | 0.032089* |
| P        | 16314.46                    | 11390.71 | 7196.181 | 70759.49 | 12470.40               | 12422.23 | 11197.84 | 15266.86 | 0.028598* |
| Mg       | 3643.43                     | 3452.96  | 2134.017 | 11067.04 | 3916.98                | 3458.95  | 2675.01  | 7307.01  | 0.160094  |
| K        | 14004.90                    | 13670.57 | 9019.566 | 38335.28 | 14893.80               | 14808.00 | 10696.17 | 17856.83 | 0.032089* |
| Na       | 13610.53                    | 12541.19 | 3524.137 | 36144.06 | 13045.78               | 15012.96 | 3102.05  | 20201.21 | 0.924177  |
| Fe       | 647.91                      | 505.17   | 212.228  | 2785.82  | 703.66                 | 584.47   | 453.93   | 1588.26  | 0.03088*  |
| Zn       | 34.35                       | 27.35    | 7.068    | 322.14   | 72.66                  | 30.73    | 10.68    | 298.56   | 0.076691  |
| Se       | 0.14                        | 0.12     | 0.038    | 0.41     | 0.70                   | 0.12     | 0.03     | 5.69     | 0.831172  |
| Sr       | 47.00                       | 32.92    | 6.784    | 258.42   | 33.23                  | 19.45    | 12.74    | 92.28    | 0.033331* |

\*p < 0.05 - statistically significant difference

**Table S4.** Element content of spirulina supplements in tablets depending on the of cultivation method

| Elements | Conventional growing (n=16) |          |          |          | Organic growing (n=10) |          |          |          | p value   |
|----------|-----------------------------|----------|----------|----------|------------------------|----------|----------|----------|-----------|
|          | Mean                        | Median   | Min.     | Max.     | Mean                   | Median   | Min.     | Max.     |           |
|          | Elements content [mg/kg]    |          |          |          |                        |          |          |          |           |
| Ca       | 14328.00                    | 2070.27  | 1071.932 | 76781.53 | 2310.14                | 1806.04  | 870.89   | 7299.05  | 0.073099  |
| P        | 18541.02                    | 11488.26 | 8398.983 | 70759.49 | 12470.40               | 12422.23 | 11197.84 | 15266.86 | 0.058103  |
| Mg       | 3421.35                     | 3152.82  | 2134.017 | 6551.79  | 3916.98                | 3458.95  | 2675.01  | 7307.01  | 0.007932* |
| K        | 12831.63                    | 12226.07 | 9019.566 | 21282.61 | 14893.80               | 14808.00 | 10696.17 | 17856.83 | 0.000419* |
| Na       | 15247.70                    | 13487.08 | 3774.737 | 36144.06 | 13045.78               | 15012.96 | 3102.05  | 20201.21 | 0.450316  |
| Fe       | 636.89                      | 452.89   | 212.228  | 2785.82  | 703.66                 | 584.47   | 453.93   | 1588.26  | 0.001533* |
| Zn       | 39.43                       | 28.54    | 7.068    | 322.14   | 72.66                  | 30.73    | 10.68    | 298.56   | 0.215863  |
| Se       | 0.15                        | 0.12     | 0.038    | 0.41     | 0.70                   | 0.12     | 0.03     | 5.69     | 0.527603  |
| Sr       | 46.24                       | 28.62    | 6.784    | 258.42   | 33.23                  | 19.45    | 12.74    | 92.28    | 0.103549  |

\*p < 0.05 - statistically significant difference
